# Supplementary material
Source: PubMed Central journal article supplement (PMC3750717)
Supplement: NIHMS344735-supplement-1_si_001.pdf [file NIHMS344735-supplement-1_si_001.pdf]

**Supplemental Table 1.** Primer / probe sets for target genes evaluated by qRT-PCR.

| <i>Gene ID</i> | <i>NCBI RefSeq</i> | <i>Species</i> | <i>ABI assay ID</i> |
|----------------|--------------------|----------------|---------------------|
| <i>ACTB</i>    | DQ464112           | <i>Mf</i>      | (custom)            |
| <i>ADIPOQ</i>  | NM_001032871       | <i>Mm</i>      | Rh02788052_m1       |
| <i>DGAT2</i>   | NM_032564.3        | <i>Hs</i>      | Hs01045911_m1       |
| <i>GAPDH</i>   | DQ464111           | <i>Mf</i>      | (custom)            |
| <i>GPAM</i>    | XM_001088103       | <i>Mm</i>      | Rh02878272_m1       |
| <i>GPD1</i>    | XM_001102726       | <i>Mm</i>      | Rh02857284_m1       |
| <i>GYS1</i>    | NM_001032886       | <i>Mm</i>      | Rh01102890_m1       |
| <i>LASS6</i>   | XM_001102396       | <i>Mm</i>      | Rh02891284_m1       |
| <i>LEP</i>     | NM_001042755       | <i>Mm</i>      | Rh02788316_m1       |
| <i>LPIN1</i>   | NM_145693          | <i>Hs</i>      | Hs01041902_m1       |
| <i>LPL</i>     | NM_000237.2        | <i>Hs</i>      | Hs01012569_m1       |
| <i>PGC1A</i>   | XM_001105289       | <i>Mm</i>      | Rh01016729_m1       |
| <i>PGC1B</i>   | NM_133263.2        | <i>Hs</i>      | Hs00370186_m1       |
| <i>PLIN</i>    | NM_002666.3        | <i>Hs</i>      | Hs01106922_m1       |
| <i>PPARA</i>   | NM_001033029       | <i>Mm</i>      | Rh00947536_m1       |
| <i>PPARG</i>   | NM_138711          | <i>Hs</i>      | Hs01115511_m1       |
| <i>SCD</i>     | XM_001107910       | <i>Mm</i>      | Rh02929461_m1       |
| <i>SORBS1</i>  | NM_001034954       | <i>Hs</i>      | Hs00908952_m1       |

*Hs*, *Homo sapiens*; *Mf*, *Macaca fascicularis* (cynomolgus macaque); *Mm*, *Macaca mullata* (rhesus macaque)
